# Supplementary material for: UV-selective organic absorbers for the cosensitization of greenhouse-integrated dye-sensitized solar cells: synthesis and computational study
Source: Royal Society of Chemistry journal article supplement (doi:10.1039/d2ra01099b), 2022-01-01
Supplement: d2ra01099b1.pdf [file d2ra01099b1.pdf]

## Supporting Information

### UV-Selective Organic Absorbers for Cosensitization of Greenhouse-Integrated Dye-Sensitized Solar Cells: Synthesis and Computational Study.

Rua B. Alnoman,<sup>a</sup> Eman Nabil,<sup>\*b</sup> Shazia Parveen,<sup>a</sup> Mohamed Hagar<sup>ab</sup> and Mohamed Zakaria<sup>\*b</sup>

<sup>a</sup> Department of Chemistry, Faculty of Science, Taibah University, Yanbu, 46423, Saudi Arabia.

<sup>b</sup> Department of Chemistry, Faculty of Science, Alexandria University, Alexandria 21321, Egypt.

\* Correspondence: Mohamed Zakaria, [mohamed.zakaria@alexu.edu.eg](mailto:mohamed.zakaria@alexu.edu.eg),  
Eman Nabil, [eman.nabil@alexu.edu.eg](mailto:eman.nabil@alexu.edu.eg).

## Exchange-Correlation (XC) Functionals Performance.

Here, we justify the choice of the exchange–correlation energy functional  $E_{xc}[\rho]$  employed in the time-dependent scheme. In the present work, 12 XC-functionals, grouped into five different categories, were tested. The considered XC-functionals are: **(i)** Three functionals based on hybrid generalized-gradient approximation (H-GGA), B3LYP<sup>1, 2</sup> functional with 20% HFX (Hartree–Fock exact exchange), PBE0<sup>3</sup> with 25% HFX, and APF-D<sup>4</sup> functional with 23% HFX and dispersion effects; **(ii)** Three among hybrid meta-GGA (GGA plus local kinetic energy density): M06-2X<sup>5</sup> (54% HFX),  $\tau$ -HCTHhyb<sup>6</sup> (15% HFX) and TPSSH<sup>7</sup> (10% HFX); **(iii)** Four range-separated hybrid (RSH) long-range corrected GGA functionals, CAM-B3LYP<sup>8</sup> (short range 19% HFX and long range 65% HFX), LC- $\omega$ PBE<sup>9</sup> (short range 0% HFX and long range 100% HFX),  $\omega$ B97X-D<sup>10</sup> with dispersion effects (short range 22% HFX and long range 100% HFX), and the meta-GGA M11<sup>11</sup> (short range 42.8% HFX and long range 100% HFX); **(iv)** One RSH middle-range corrected functional, HISSb<sup>12, 13</sup> (HFX% = 0-60-0 at short-middle-long interelectronic separations, in that order); **(v)** One among the RSH screened-exchange functionals, MN12-SX<sup>14</sup> (meta-NGA with HFX%= 25-0 at short-long interelectronic separations). The electronic absorption spectra were obtained by calculating a set of 20 excited states for each XC functional. Figure 1 depicts the mean signed deviation (MSD) of calculated  $\lambda_{max}$  to the experimentally measured ones, addition to the mean absolute error (MAE) calculated for each XC functional.

The results show that functionals perform differently depending on the system. In terms of mean absolute error, the best performing functional is MN12-SX with MAE of ca. 6.3 nm (0.11 eV). Typically, the MSD obtained with MN12-SX were +4.1 nm (-0.069 eV), -14 nm (+0.261 eV), +0.2 nm (-0.003 eV) and -4.8 nm (+0.083 eV) for DI-N1, DN-2, DI-CA1 and DI-CA-2, respectively. Therefore, MN12-SX is the best performing functional for DI-CA1 dye and provided comparable accuracy with discrepancy of ca. 2 and 2.5 nm (0.034 and 0.051 eV) to both PBE0 and B3LYP as the best performing functionals for DI-N1 (MSD = +2.1 nm, -0.035 eV) and DI-CA-2 (MSD = +1.9 nm, -0.032 eV) hybrid functionals, respectively. For DI-N2, the hybrid meta-GGA functional  $\tau$ -HCTHhyb is clearly superior to MN12-SX, PBE0 and B3LYP functionals. Considering that all RSH functionals with long-range correction and the global hybrid meta-GGA functional M06-2X provided poor estimates for all dyes. They tend to severely overestimate the transition energies with following trend of MAE: LC- $\omega$ PBE (44.2 nm) > M11 (38.1 nm) >  $\omega$ B97X-D (31.1 nm) > M06-2X (29.5 nm) > CAM-B3LYP (21.7 nm). Additionally, the hybrids with constant HFX all over the space and the RSH with screened HFX at long range behave very well presenting MAE values of at most 9.1 nm (0.16 eV). A general conclusion could be emerged accordingly: for the present set of dyes, the electronic transitions are local valence excitations (LE) which are energetically below the first ionization potential with unchanging principal quantum number. However, the excited states of DI-N1 and DI-CA1 could not be purely LE, but mixed with charge transfer (CT) excitations between orbitals with appreciable spatial overlap. This could be confirmed by the outperformance of long-range corrected hybrids and M06-2X in reproducing DI-N1 and DI-CA1 excitations than that of DI-N2 and DI-CA2, as can be shown in Figure 1. Especially for CAM-B3LYP, for which HFX increases up to 65% at long range and not all the way up to 100%, and that is known to perform well in CT excitations with intermediate spatial overlap, it delivered MSD of -20.4, -39.4, -19.1 and -38.1 nm for DI-N1, DI-N2, DI-CA1 and DI-CA2, respectively. Although DI-N1 and DI-CA1 dyes are expected to exhibit a partial CT character, global hybrids like PBE0 and the screened-exchange RSH (MN12-SX) accurately reproduced  $\lambda_{max}$  probably for the reason that the distance between the electron donor and the electron acceptor is rather small. Overall, the non-separable functional, MN12-SX that depends on the density, the density gradient, and the kinetic energy density with 25% of HFX at short-range and a screened HFX at long-range, seems to be the most reliable functional for the set of diimide dyes with MAE of ca. 6.3 nm (0.11 eV) attaining the acceptable error (absolute error < 0.15 eV)<sup>15</sup> of TD-DFT scheme.

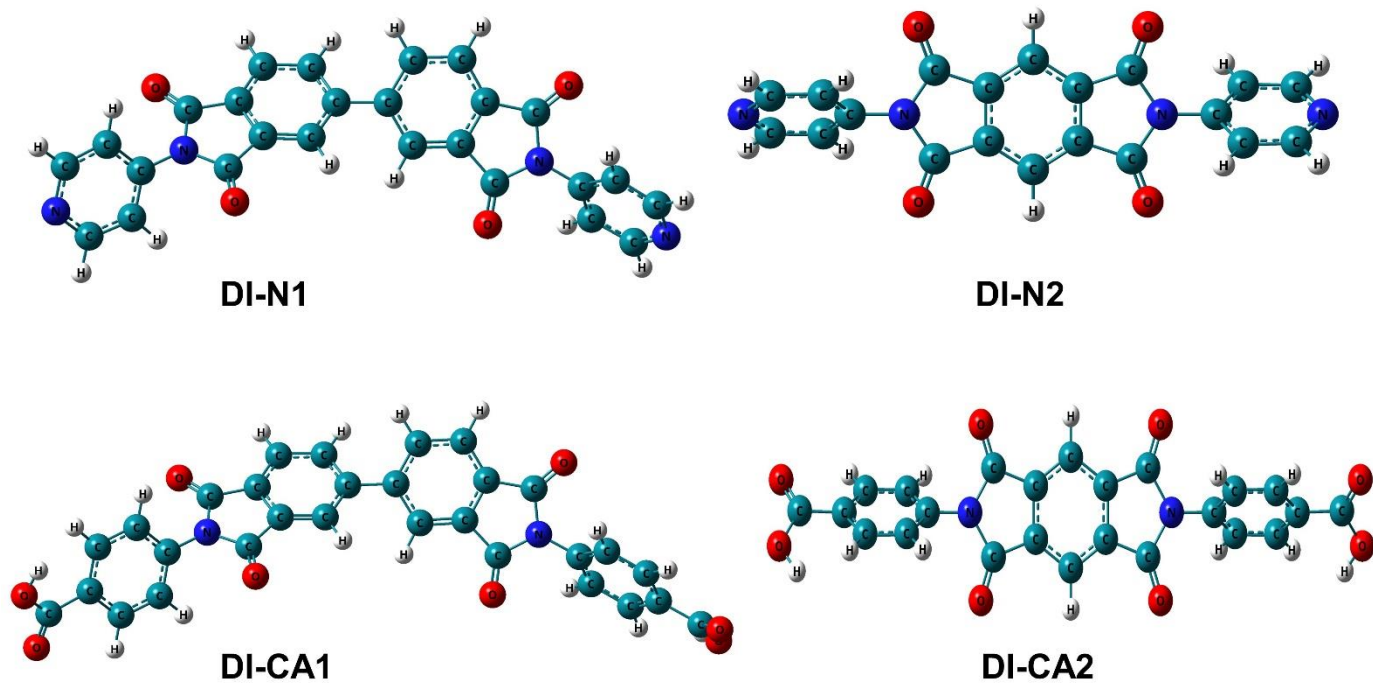

**Figure S1.** Ground state optimized geometries of studied UV-dyes.

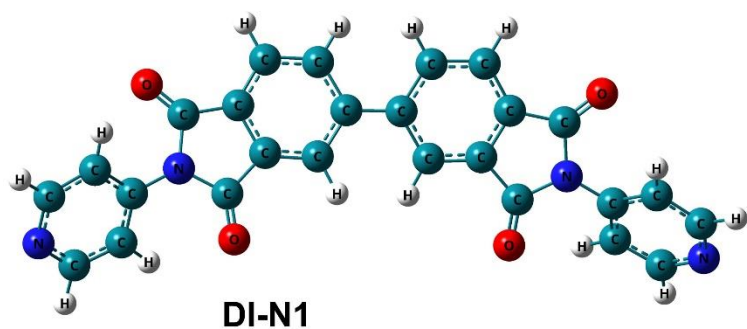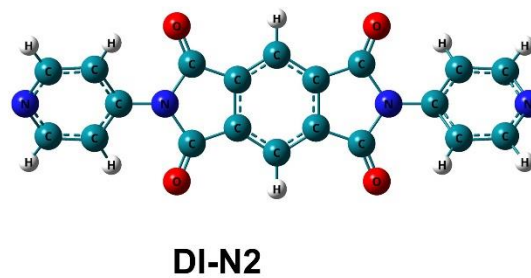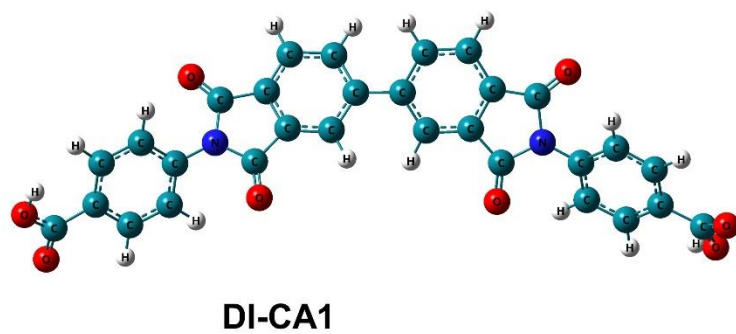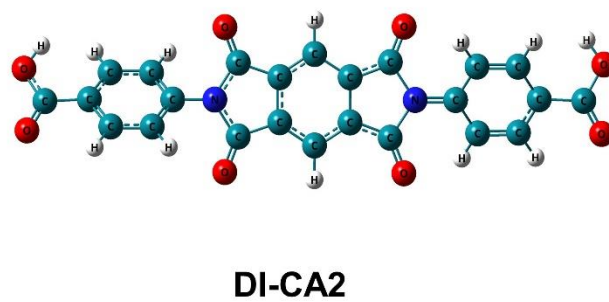

**Figure S2.** Excited state optimized geometries of studied UV-dyes.

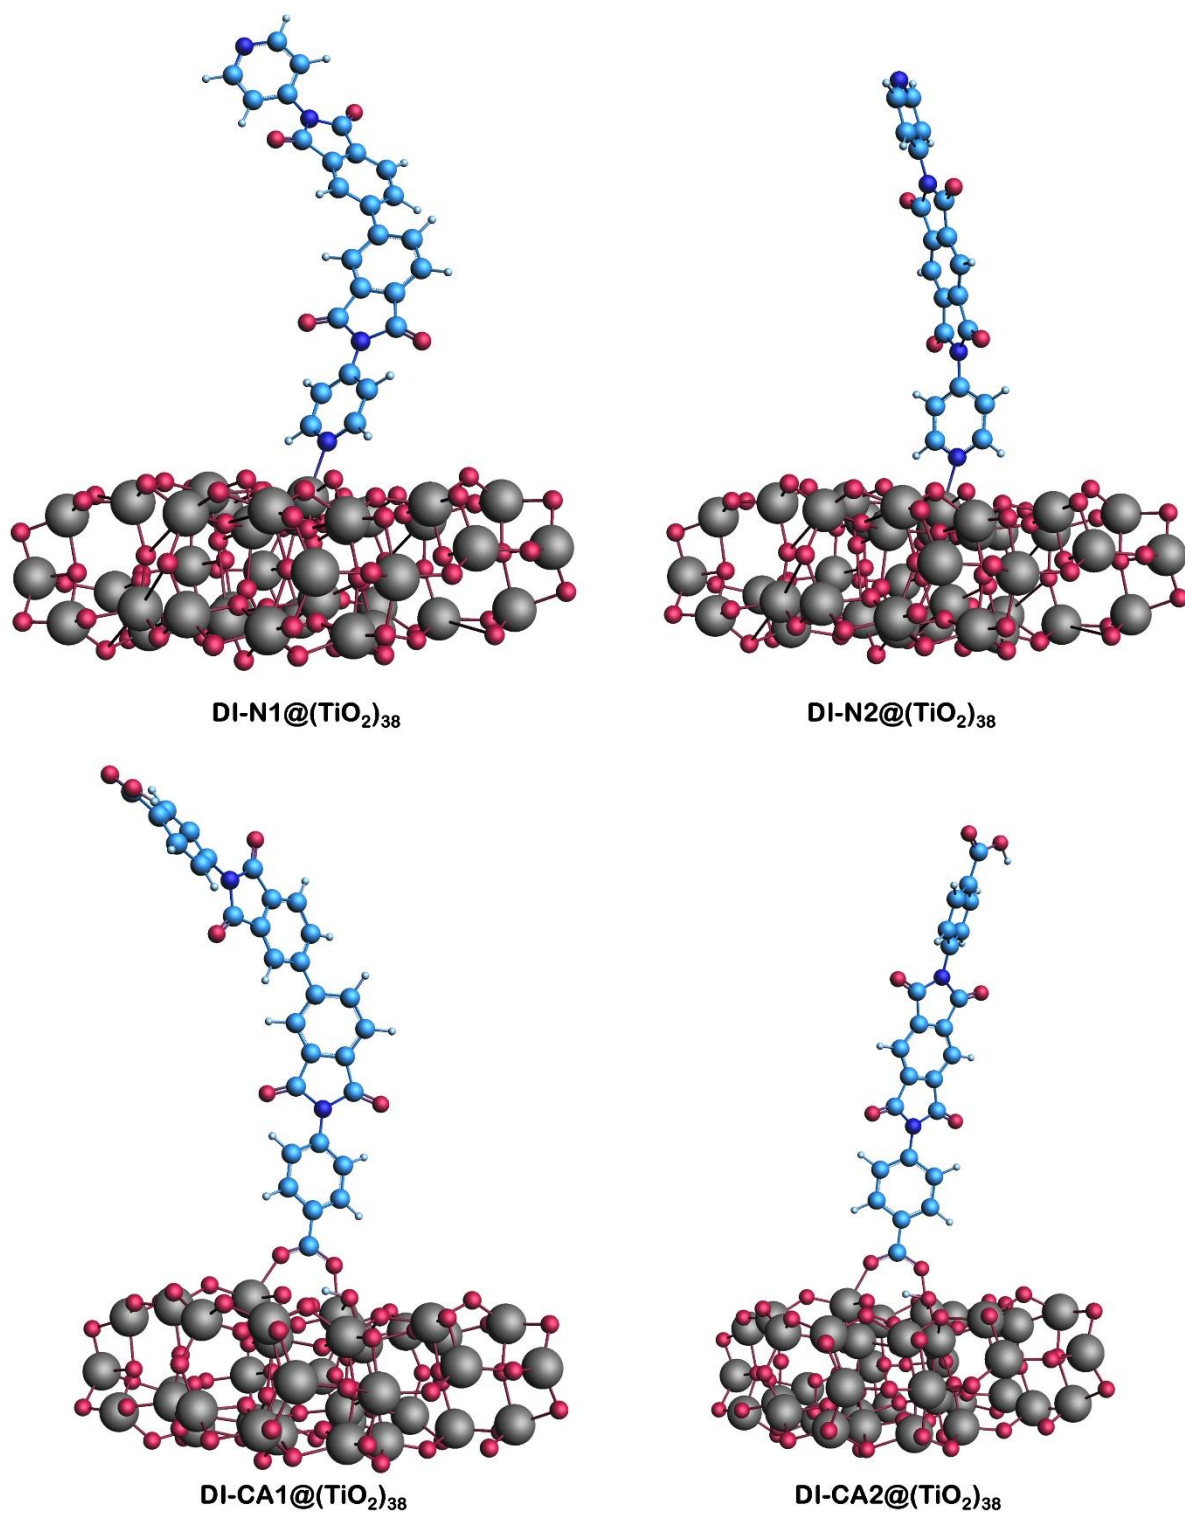

**Figure S3.** Ground state optimized geometries of dyes adsorbed on a  $(\text{TiO}_2)_{38}$  cluster (as a model of bulk  $\text{TiO}_2$ ).

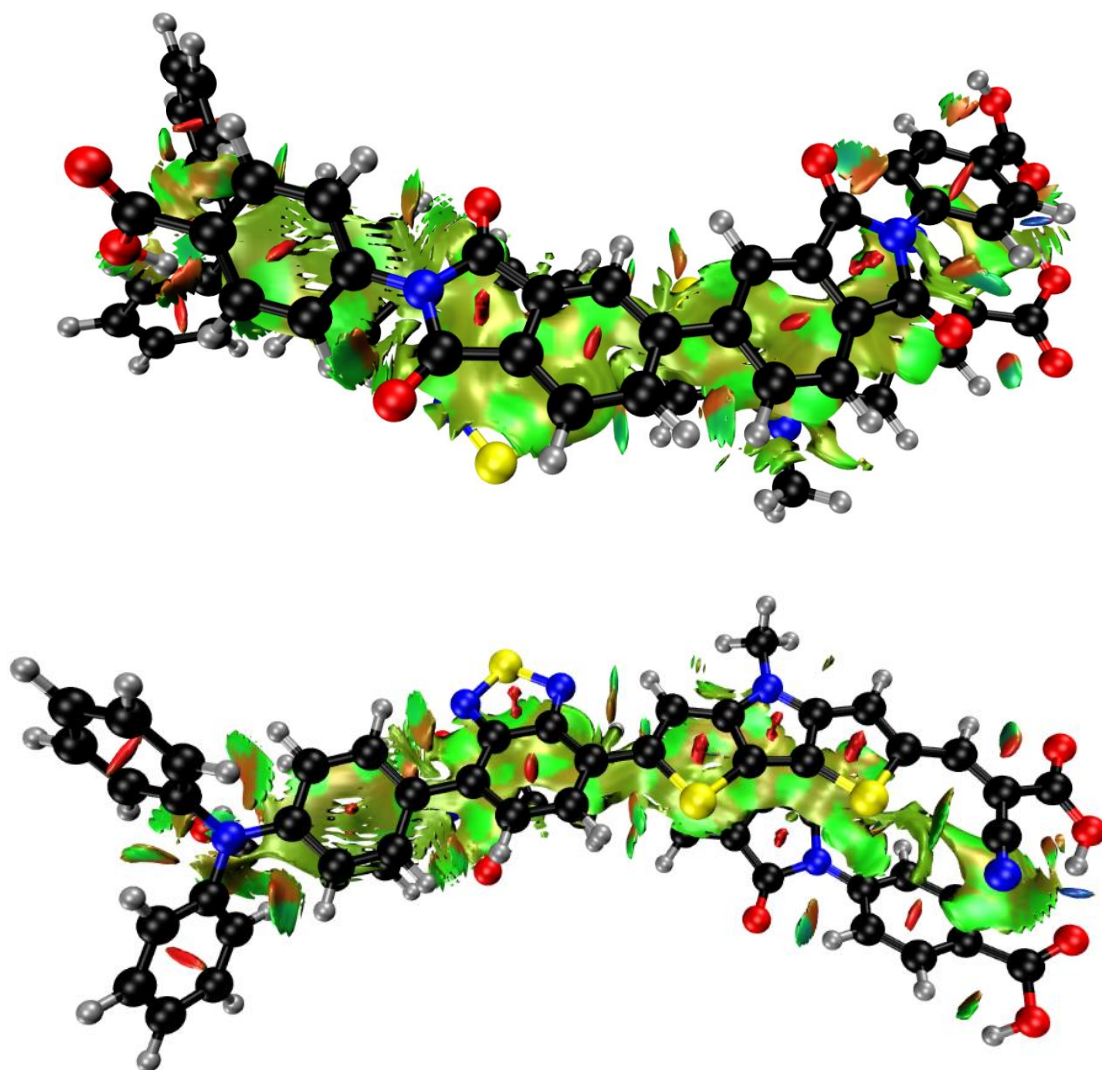

**Figure S4.** Reduced density gradient isosurface map for the proposed cosensitizers DI-CA1/BTD-DTP1 showing both intra- and inter-molecular interactions.

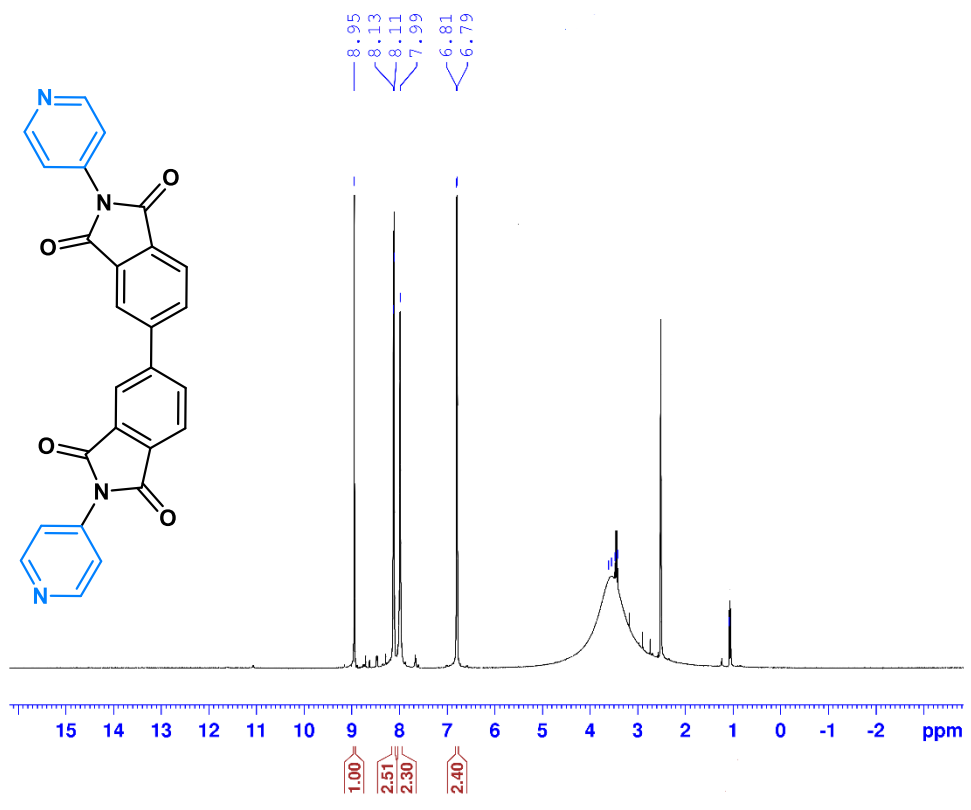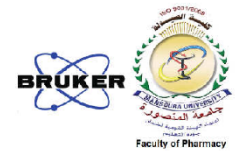

```

Current Data Parameters
NAME: Mohamed Kateric
PROBHD: QNP1H
PROCNO: 1
=====
F2 - Acquisition Parameters
Date_   : 20220129
Time    : 11:58 h
INSTRUM : spect
PROBHD  : ggcprb_0045
PULPROG : zgpg
TD       : 65536
SOLVENT : DMSO
NS       : 2
DS       : 2
SFO1    : 801.820 MHz
FIDRES  : 4.201850 Hz
AQ       : 4.0384467 sec
RG       : 99.3
DE       : 62.000 usec
JE       : 5.50 usec
TE       : 300.2 K
DIL      : 1
DELT    : 1.0000000 sec
TSD1    : 400.202472 MHz
NUC1    : 13C
P1      : 13.00 usec
PCP1    : 13.0000000 N
=====
F2 - Processing parameters
SI      : 65536
SF      : 400.2000000 MHz
WDW     : EM
SSB     : 0
LB      : 0.20 Hz
GB      : 0
PC      : 1.00
  
```

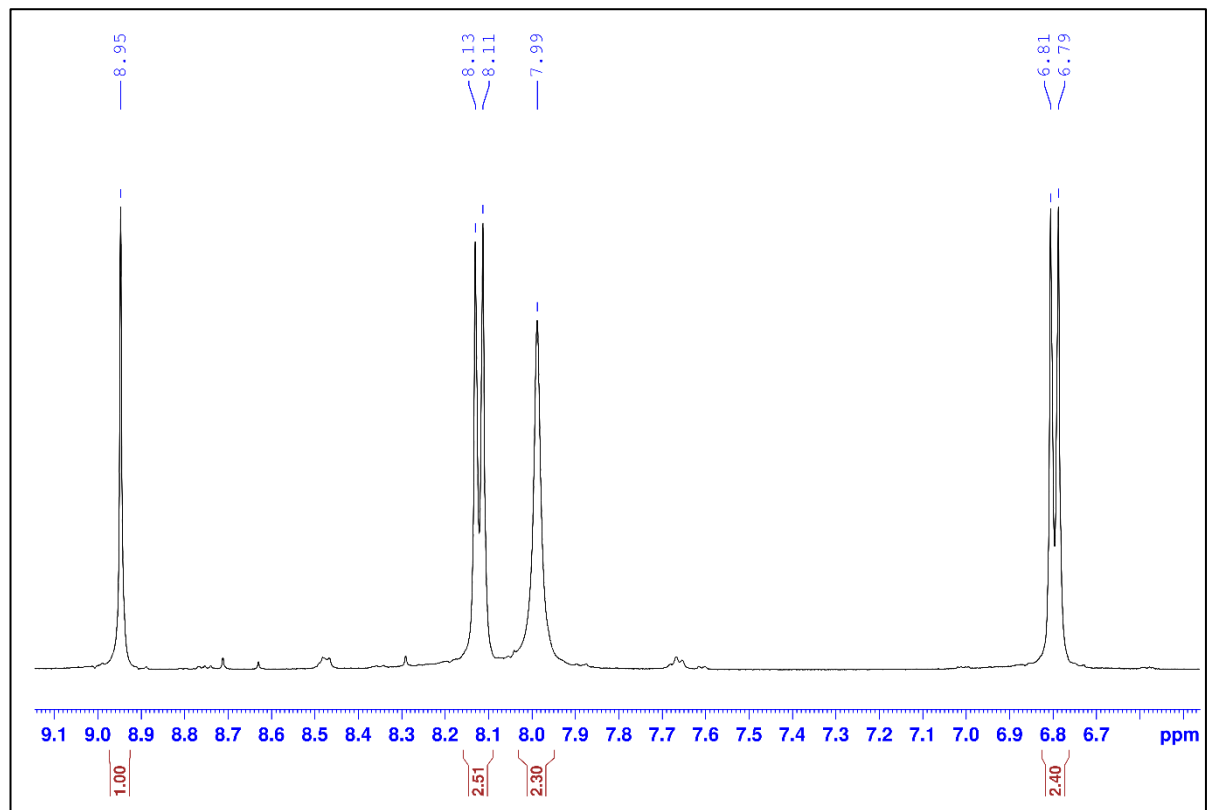

**Figure S5.** <sup>1</sup>H NMR (400 MHz, DMSO-*d*<sub>6</sub>) of 2,2'-di(pyridin-4-yl)-[5,5'-biisindoline]-1,1',3,3'-tetraone, **DI-N1**

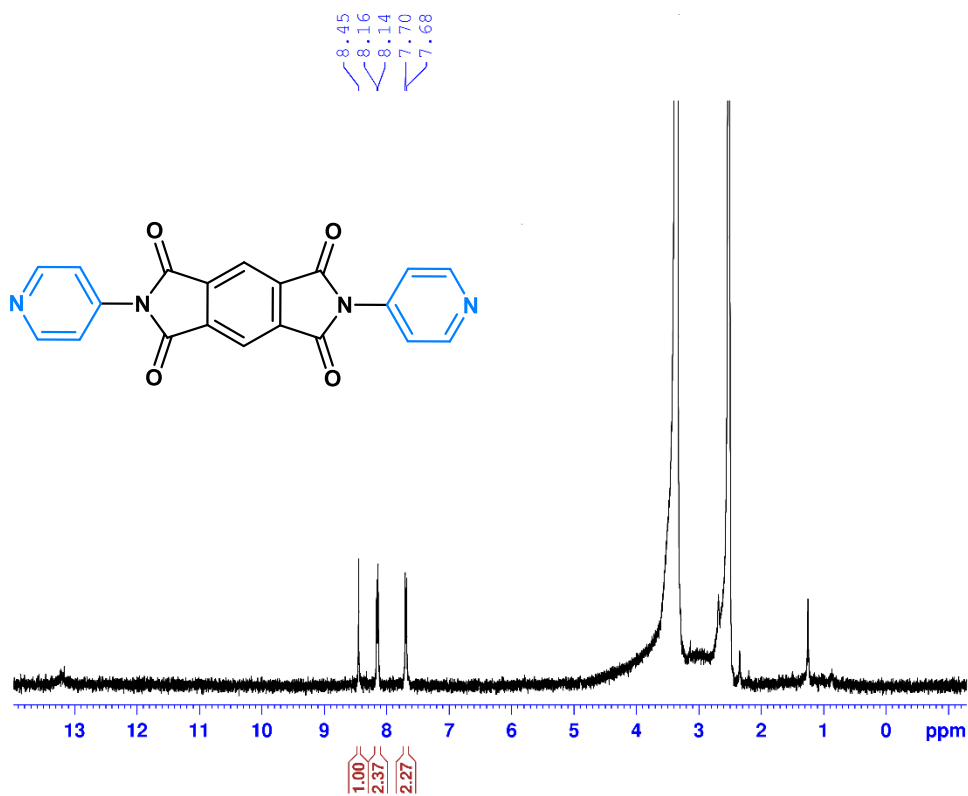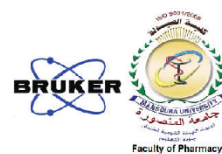

Current Data Parameters  
 NAME: Mohamed Isakaya  
 EXPNO: 1  
 PROCNO: 1  
 F2 - Acquisition Parameters  
 Date\_ : 20260130  
 Time : 11:58:24  
 INSTRUM : spect  
 CHANNEL : 2108618\_0050\_0  
 PULPROG : zgpg30  
 TD : 65536  
 SUBVENT : EM03  
 VS : 16  
 US : 2  
 DFT : H012,020 Hz  
 FIDRES : 0.244939 Hz  
 AQ : 5.039346 sec  
 SC : 176.42  
 LK : 02.400 usec  
 DE : 8.50 usec  
 TE : 293.5 K  
 D1 : 1.0000000 sec  
 D2 : 1  
 SFO1 : 400.2024112 MHz  
 SOLID : 1F  
 P1 : 3.50 usec  
 P1PL1 : 15.0000000 W  
 F2 - Processing parameters  
 SI : 65536  
 SF : 400.202406 MHz  
 NUC : 13  
 RBW : 0  
 GB : 0.30 Hz  
 PC : 1.00

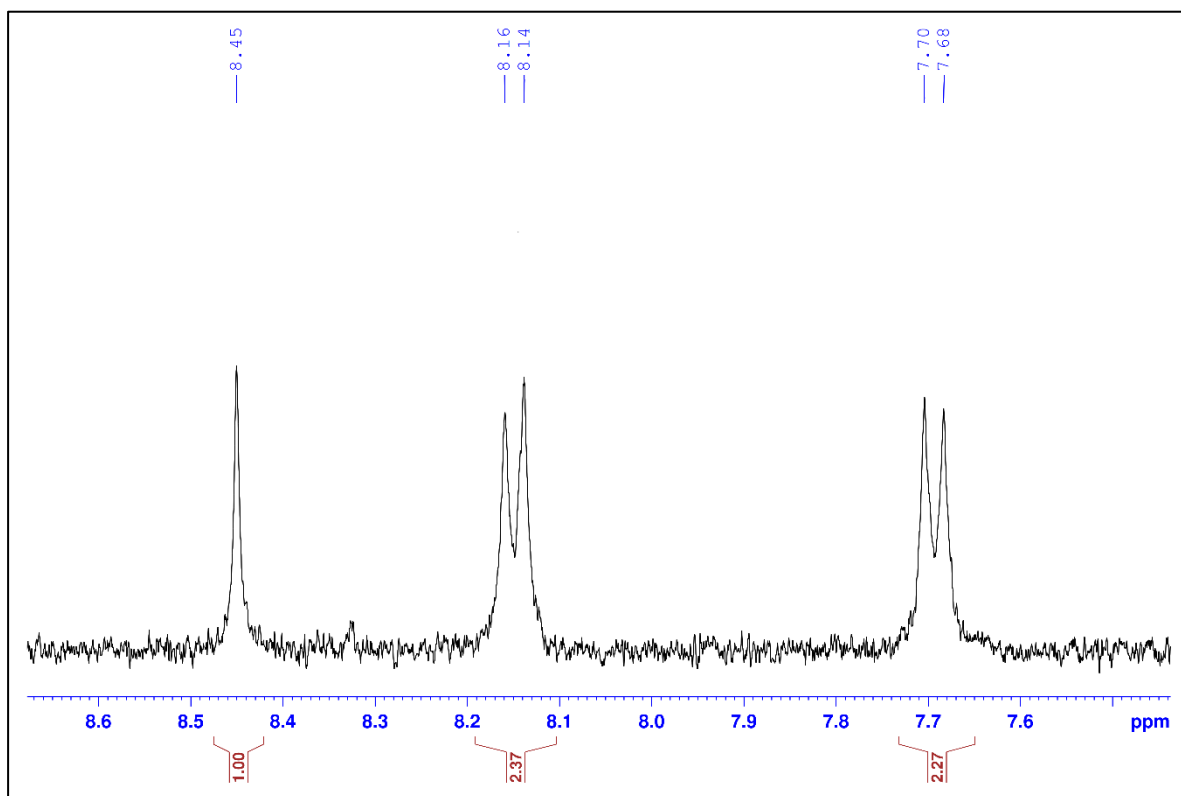

**Figure S6.** <sup>1</sup>H NMR (400 MHz, DMSO-*d*<sub>6</sub>) of 2,6-di(pyridin-4-yl)pyrrolo[3,4-f]isoindole-1,3,5,7(2H,6H)-tetraone **DI-N2**



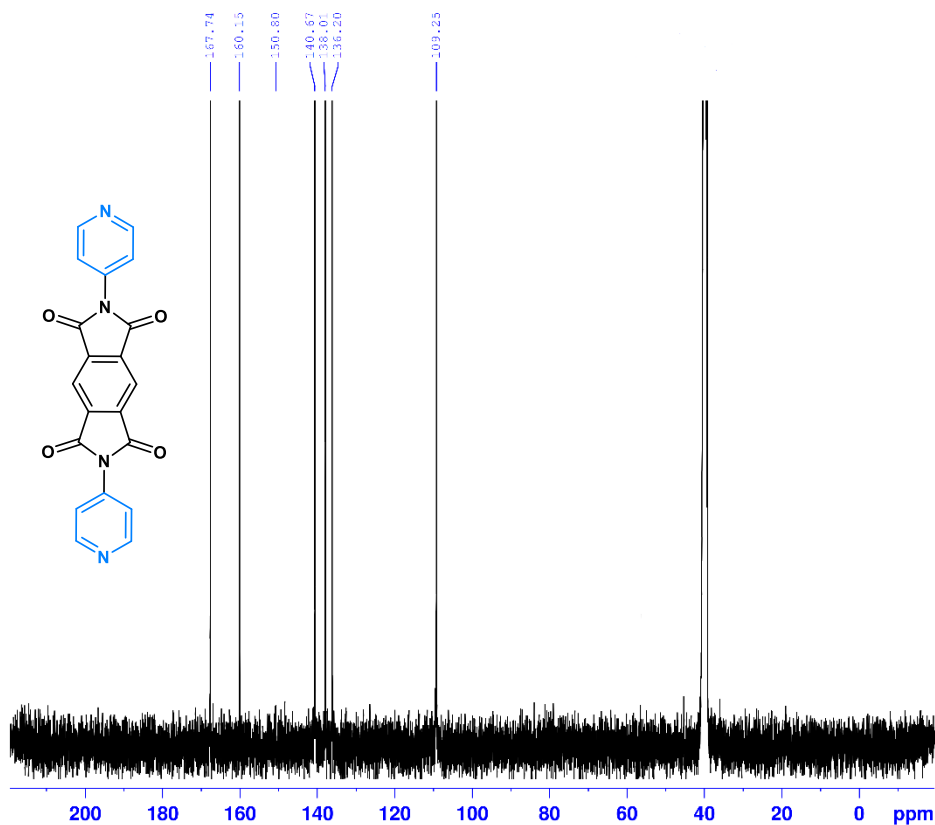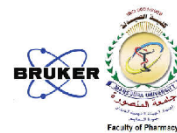

Current Date Parameters  
 NAME Mohamed Zakaria  
 EXPNO 10  
 PROCNO 1

F2 - Acquisition Parameters  
 Date\_ 20220201  
 Time 22:22 h  
 INSTRUM spect  
 FREQID 2108618 9942 (1  
 PULPROG zgpg30  
 PD 65536  
 SOLVENT DMSO  
 NS 2200  
 DS 4  
 SWH 24038.461 Hz  
 FIDRES 0.733596 Hz  
 AQ 1.363198 sec  
 RG 197.77  
 EC 20.800 usec  
 LE 6.00 usec  
 TE 295.2 K  
 D1 2.0000000 sec  
 D11 0.0300000 sec  
 TD0 1  
 SF01 100.6404331 MHz  
 NUC1 13C  
 P1 10.00 usec  
 PLW1 47.0000000 W  
 SF02 400.2016008 MHz  
 NUC2 1H  
 CPDPRG2 waltz16  
 PCPD2 90.00 usec  
 PLW2 13.0000000 W  
 PLW12 0.2524999 W  
 PLW13 0.1474300 W

F2 - Processing parameters  
 SI 32768  
 SF 100.6303700 MHz  
 REW EM  
 SSB 0  
 LB 1.00 Hz  
 GB 0  
 PC 1.40

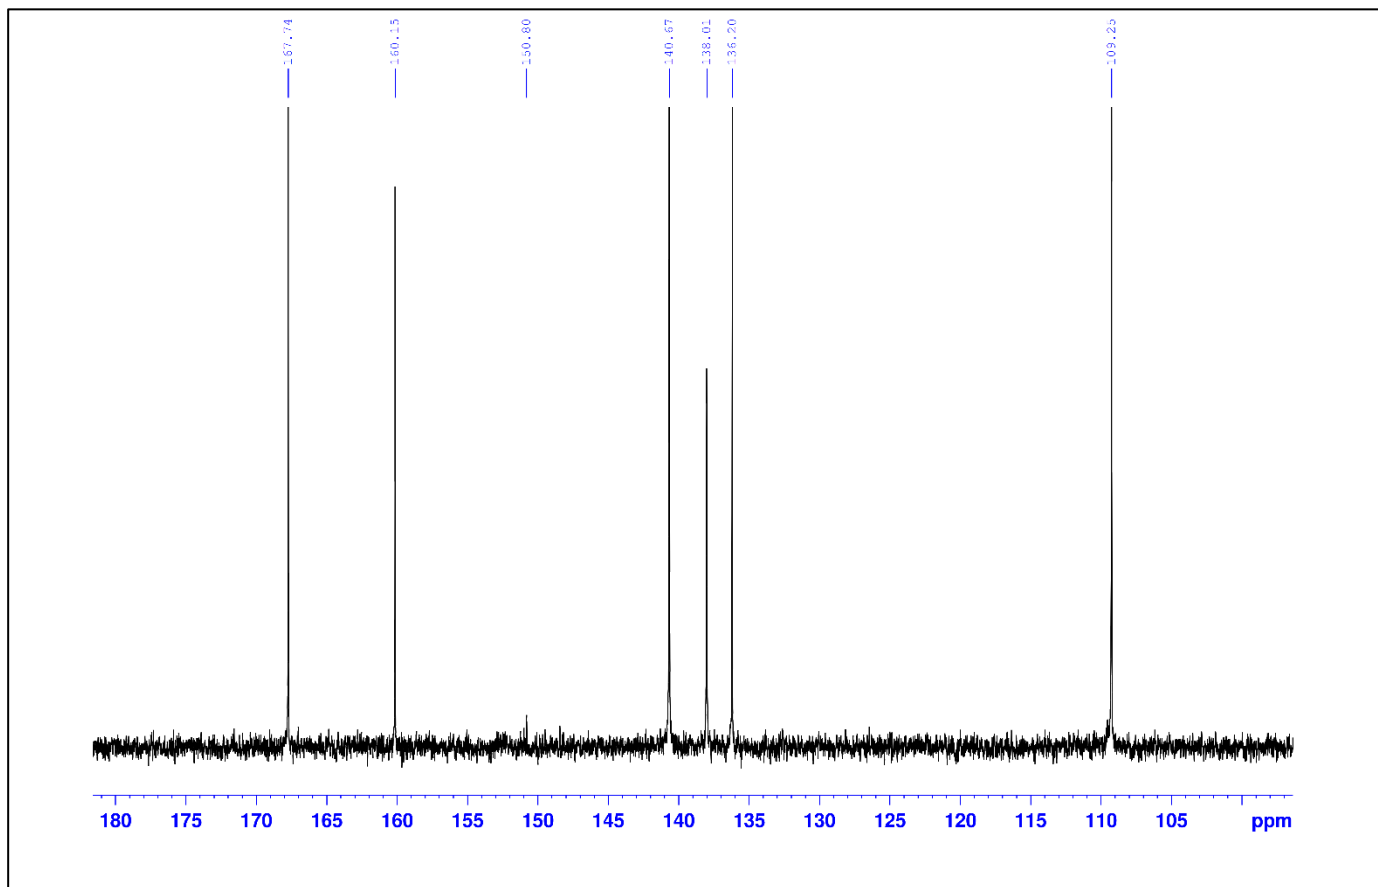

Figure S7. <sup>13</sup>CNMR (100 MHz, DMSO-*d*<sub>6</sub>) of 2,6-di(pyridin-4-yl)pyrrolo[3,4-f]isoindole-1,3,5,7(2H,6H)-tetraone DI-N2.

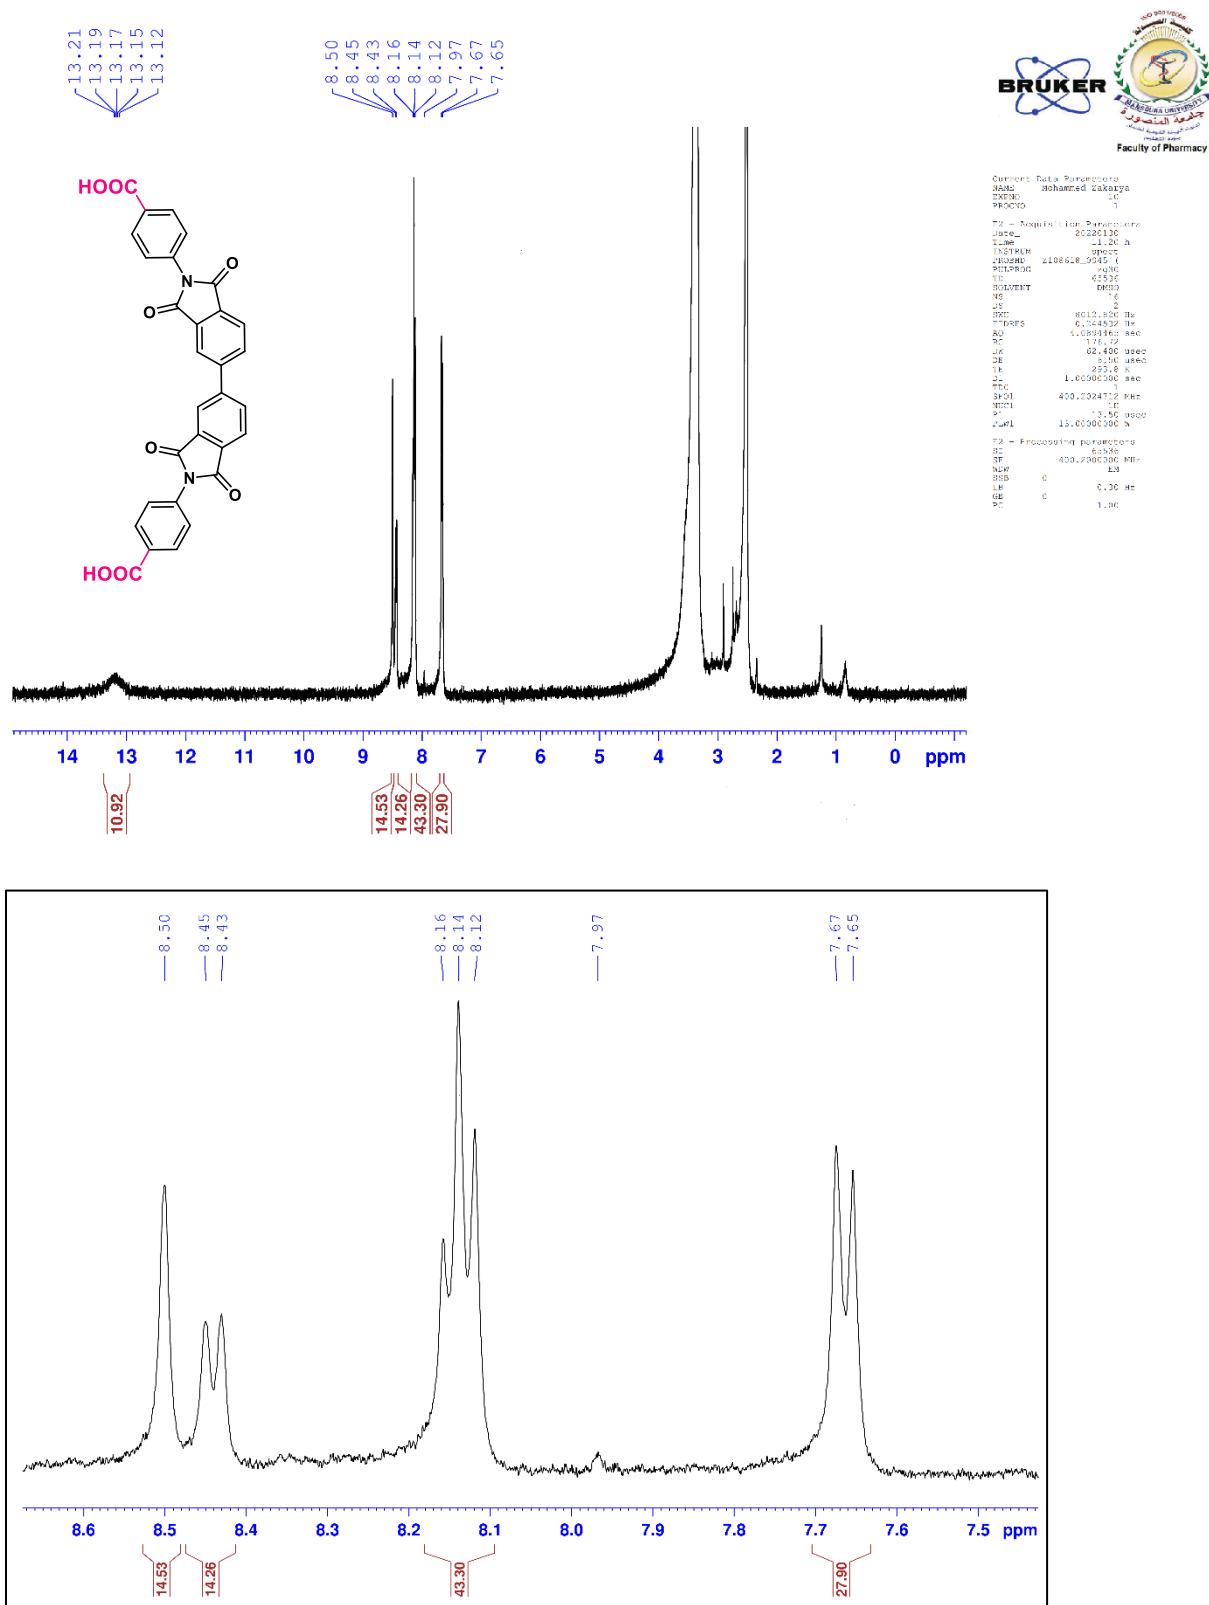

**Figure S8.** <sup>1</sup>H NMR (400 MHz, DMSO-*d*<sub>6</sub>) of 4,4'-(1,1',3,3'-tetraoxo-[5,5'-biisindoline]-2,2'-diyl)dibenzoic acid, DI-CA1

## Atomic Coordinates of Isolated Dyes:

Below, we provide the atomic positions (coordinates) for the optimized geometries of the studied diimide UV-dyes obtained by DFT- B3LYP/6-31+g(d).

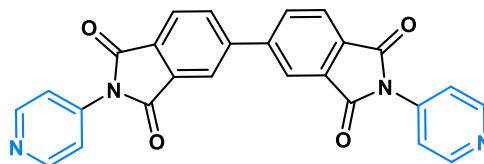

### DI-N1 (48 atoms)

|   |             |             |             |   |             |             |             |
|---|-------------|-------------|-------------|---|-------------|-------------|-------------|
| C | -2.79960113 | 2.57311546  | -0.86539615 | H | 0.99316596  | -0.64233422 | -0.52810128 |
| C | -1.41061947 | 2.55540589  | -0.69244786 | H | -7.32632095 | 0.73377967  | 1.28038909  |
| C | -0.74113667 | 1.44084717  | -0.14468608 | H | -9.48106694 | -0.50148511 | 1.41108317  |
| C | -1.48709292 | 0.30573940  | 0.24084490  | H | -7.97142008 | -3.67641688 | -0.76480985 |
| C | -2.86073331 | 0.33455089  | 0.06327920  | H | -5.76374155 | -2.56324094 | -1.03379887 |
| C | -3.51147202 | 1.44542991  | -0.47853492 | H | 6.14629220  | -1.48470776 | -2.06854674 |
| C | 0.73709713  | 1.45262996  | 0.01398604  | H | 8.33238273  | -2.67210065 | -2.05903904 |
| C | 1.40962694  | 2.63392127  | 0.39200891  | H | 9.12032750  | -1.51372186 | 1.83062911  |
| C | 2.80072921  | 2.67821517  | 0.54223397  | H | 6.94796477  | -0.31494843 | 2.01293192  |
| C | 3.51206616  | 1.50925535  | 0.30605703  |   |             |             |             |
| C | 2.85814542  | 0.33279575  | -0.06805897 |   |             |             |             |
| C | 1.48220439  | 0.27607506  | -0.21834731 |   |             |             |             |
| C | -3.88050686 | -0.70230093 | 0.37688122  |   |             |             |             |
| N | -5.12446932 | -0.14835788 | -0.00858138 |   |             |             |             |
| C | -4.96748982 | 1.15740322  | -0.53719705 |   |             |             |             |
| C | 4.97074732  | 1.23703431  | 0.37448279  |   |             |             |             |
| N | 5.12528850  | -0.12850291 | 0.02933626  |   |             |             |             |
| C | 3.87785972  | -0.73470892 | -0.25293934 |   |             |             |             |
| C | -6.37266608 | -0.82160614 | 0.10725365  |   |             |             |             |
| C | 6.37494635  | -0.80671692 | -0.02101217 |   |             |             |             |
| C | -7.43193028 | -0.23435224 | 0.80309891  |   |             |             |             |
| C | -8.63661367 | -0.93433224 | 0.87943729  |   |             |             |             |
| N | -8.83054247 | -2.14511433 | 0.33277627  |   |             |             |             |
| C | -7.79868626 | -2.69616969 | -0.32598826 |   |             |             |             |
| C | -6.55643288 | -2.07824955 | -0.47467378 |   |             |             |             |
| C | 6.76942656  | -1.47764833 | -1.18089959 |   |             |             |             |
| C | 7.99921332  | -2.13675404 | -1.17272230 |   |             |             |             |
| N | 8.82958789  | -2.15082768 | -0.11781365 |   |             |             |             |
| C | 8.43687180  | -1.49293812 | 0.98466212  |   |             |             |             |
| C | 7.22224861  | -0.81389245 | 1.08965963  |   |             |             |             |
| O | -3.72647725 | -1.80195700 | 0.87465771  |   |             |             |             |
| O | -5.87132149 | 1.85626507  | -0.95633682 |   |             |             |             |
| O | 3.71864454  | -1.90065396 | -0.56279399 |   |             |             |             |
| O | 5.88210294  | 1.99640307  | 0.64644638  |   |             |             |             |
| H | -3.29298475 | 3.43951019  | -1.29574740 |   |             |             |             |
| H | -0.83408244 | 3.41852839  | -1.01087272 |   |             |             |             |
| H | -1.00083707 | -0.56000686 | 0.67977040  |   |             |             |             |
| H | 0.83441470  | 3.53255818  | 0.59320863  |   |             |             |             |
| H | 3.29605401  | 3.59725311  | 0.84120359  |   |             |             |             |

DI-N2 (38 atoms)

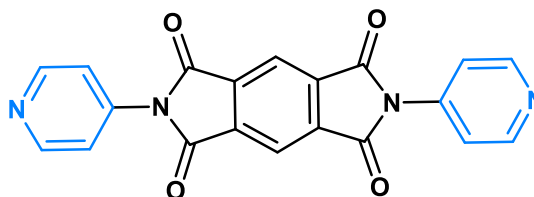

|   |             |             |             |
|---|-------------|-------------|-------------|
| C | -1.17325564 | 0.69979882  | 0.00091975  |
| C | -1.17325561 | -0.69979947 | -0.00091559 |
| C | 0.00000014  | -1.45014802 | 0.00000188  |
| C | 1.17325562  | -0.69979928 | 0.00091950  |
| C | 1.17325553  | 0.69979911  | -0.00091624 |
| C | -0.00000009 | 1.45014769  | 0.00000150  |
| C | 2.58977519  | -1.16792001 | -0.00196108 |
| N | 3.38327822  | 0.00000005  | 0.00000045  |
| C | 2.58977493  | 1.16792012  | 0.00196285  |
| C | 4.80910864  | 0.00000014  | -0.00000048 |
| C | 5.51372345  | -0.62943566 | 1.02750803  |
| C | 6.90821409  | -0.60406300 | 0.97540132  |
| N | 7.60497569  | 0.00000045  | -0.00000252 |
| C | 6.90821245  | 0.60406359  | -0.97540574 |
| C | 5.51372192  | 0.62943612  | -1.02751017 |
| O | 3.01061501  | 2.30781902  | 0.01796626  |
| O | 3.01061527  | -2.30781896 | -0.01796476 |
| C | -2.58977494 | 1.16791976  | -0.00196086 |
| N | -3.38327825 | -0.00000059 | 0.00000128  |
| C | -2.58977501 | -1.16792047 | 0.00196392  |
| O | -3.01061530 | 2.30781849  | -0.01796503 |
| O | -3.01061489 | -2.30781949 | 0.01796750  |
| C | -4.80910841 | -0.00000031 | -0.00000031 |
| C | -5.51372372 | 0.62943773  | 1.02750685  |
| C | -6.90821414 | 0.60406562  | 0.97539982  |
| N | -7.60497579 | 0.00000066  | -0.00000334 |

|   |             |             |             |
|---|-------------|-------------|-------------|
| C | -6.90821250 | -0.60406443 | -0.97540497 |
| C | -5.51372176 | -0.62943776 | -1.02750883 |
| H | 0.00000015  | -2.53550607 | 0.00000203  |
| H | -0.00000036 | 2.53550573  | 0.00000120  |
| H | 4.99990440  | -1.11894059 | 1.84801215  |
| H | 7.48827972  | -1.08710645 | 1.75840480  |
| H | 7.48827708  | 1.08710754  | -1.75840963 |
| H | 4.99990131  | 1.11894105  | -1.84801329 |
| H | -4.99990486 | 1.11894410  | 1.84801024  |
| H | -7.48827977 | 1.08711071  | 1.75840224  |
| H | -7.48827660 | -1.08710965 | -1.75840847 |
| H | -4.99990159 | -1.11894479 | -1.84801103 |

DI-CA1 (56 atoms)

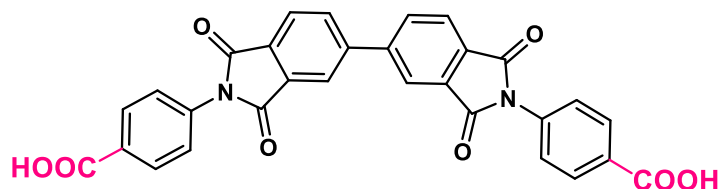

|   |              |             |             |   |              |             |             |
|---|--------------|-------------|-------------|---|--------------|-------------|-------------|
| C | -2.78768677  | -3.09497217 | 0.90277196  | O | -10.40306876 | 3.27971523  | 0.63072124  |
| C | -1.40149931  | -3.07786746 | 0.70587443  | O | -10.95547668 | 2.18610672  | -1.20987912 |
| C | -0.73921066  | -1.95502201 | 0.16726562  | H | -3.27562475  | -3.96745970 | 1.32709975  |
| C | -1.48862323  | -0.81220671 | -0.18711723 | H | -0.82086229  | -3.94795963 | 0.99741313  |
| C | -2.85934658  | -0.84187961 | 0.01052140  | H | -1.00649537  | 0.05938780  | -0.61911039 |
| C | -3.50353214  | -1.95970466 | 0.54644503  | H | 0.80974921   | -4.01765194 | -0.69256118 |
| C | 0.73554235   | -1.96558664 | -0.02060030 | H | 3.26402069   | -4.07314071 | -1.01743216 |
| C | 1.39372755   | -3.12997987 | -0.46847722 | H | 1.01072254   | 0.10195678  | 0.60874869  |
| C | 2.78006230   | -3.16839806 | -0.66158812 | H | -7.24421148  | -1.13127765 | -1.29467907 |
| C | 3.50063703   | -2.01192180 | -0.39411985 | H | -9.39784138  | 0.01728386  | -1.44420115 |
| C | 2.86073784   | -0.85394161 | 0.05512650  | H | -7.92820551  | 3.11380170  | 1.19095800  |
| C | 1.48969059   | -0.80217463 | 0.24554261  | H | -5.76109820  | 1.91855124  | 1.36070228  |
| C | -3.88359690  | 0.19936442  | -0.27497092 | H | 6.28497151   | 0.64978414  | 2.07513425  |
| N | -5.11998211  | -0.35689677 | 0.12433231  | H | 8.40347585   | 1.87267689  | 2.15164179  |
| C | -4.95846437  | -1.66746800 | 0.63343323  | H | 8.88754343   | 1.29890793  | -2.10576427 |
| C | 4.95760988   | -1.73426115 | -0.49720574 | H | 6.72199831   | 0.08820135  | -2.17255405 |
| N | 5.12414665   | -0.39049551 | -0.08737327 | H | 10.36020398  | 2.07898381  | 1.88564048  |
| C | 3.88883771   | 0.20258831  | 0.25888316  | H | -10.57882340 | 1.56417244  | -1.86137796 |
| C | -6.36930501  | 0.32503686  | 0.03655894  |   |              |             |             |
| C | 6.37554200   | 0.29268499  | -0.05117003 |   |              |             |             |
| C | -7.39548563  | -0.20387076 | -0.75183900 |   |              |             |             |
| C | -8.61369124  | 0.46846768  | -0.84139238 |   |              |             |             |
| C | -8.81169762  | 1.67396410  | -0.14894804 |   |              |             |             |
| C | -7.77485106  | 2.18810872  | 0.64633665  |   |              |             |             |
| C | -6.55774053  | 1.52015755  | 0.74050878  |   |              |             |             |
| C | 6.85518656   | 0.79247128  | 1.16297951  |   |              |             |             |
| C | 8.07051413   | 1.47473831  | 1.19622047  |   |              |             |             |
| C | 8.81356662   | 1.65843060  | 0.01908544  |   |              |             |             |
| C | 8.31886310   | 1.15165167  | -1.19342265 |   |              |             |             |
| C | 7.10578527   | 0.47032543  | -1.23206169 |   |              |             |             |
| O | -3.73695738  | 1.30532966  | -0.76206616 |   |              |             |             |
| O | -5.85860488  | -2.36947525 | 1.05663359  |   |              |             |             |
| O | 3.74307137   | 1.35255589  | 0.63047736  |   |              |             |             |
| O | 5.85875130   | -2.47588868 | -0.84412166 |   |              |             |             |
| C | 10.11061520  | 2.40267080  | -0.01408660 |   |              |             |             |
| O | 10.58844543  | 2.87063676  | -1.03053738 |   |              |             |             |
| O | 10.78126883  | 2.56504121  | 1.15120859  |   |              |             |             |
| C | -10.09520534 | 2.44082029  | -0.19519783 |   |              |             |             |

DI-CA2 (46 atoms)

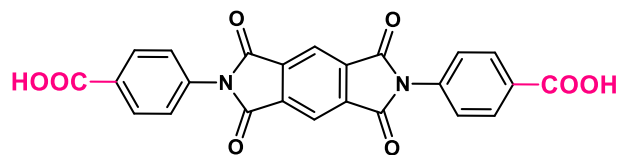

|   |             |             |             |
|---|-------------|-------------|-------------|
| C | -1.17332485 | 0.71020075  | 0.00431467  |
| C | -1.17351055 | -0.68946258 | 0.00346381  |
| C | 0.00000277  | -1.43959332 | -0.00000018 |
| C | 1.17351337  | -0.68945838 | -0.00346670 |
| C | 1.17332264  | 0.71020508  | -0.00432164 |
| C | -0.00000255 | 1.46035866  | -0.00000445 |
| C | 2.59113091  | -1.15619510 | 0.00033775  |
| N | 3.38321525  | 0.01096689  | -0.00964187 |
| C | 2.59035634  | 1.17767319  | -0.01545747 |
| C | 4.81148263  | 0.01242227  | -0.00372083 |
| C | 5.50794468  | -0.54050620 | -1.08170091 |
| C | 6.90222825  | -0.55146116 | -1.06703682 |
| C | 7.60301810  | 0.01138305  | 0.01195535  |
| C | 6.88915027  | 0.58244279  | 1.07733148  |
| C | 5.49728557  | 0.57124214  | 1.08015761  |
| O | 3.01121160  | 2.31794428  | -0.03794288 |
| O | 3.01288320  | -2.29622235 | 0.02118745  |
| C | -2.59036040 | 1.17766333  | 0.01545312  |
| N | -3.38321521 | 0.01095421  | 0.00963866  |
| C | -2.59112665 | -1.15620495 | -0.00033841 |
| O | -3.01122034 | 2.31793260  | 0.03794056  |
| O | -3.01287277 | -2.29623437 | -0.02118318 |
| C | -4.81148298 | 0.01241125  | 0.00372231  |
| C | -5.50794563 | -0.54050630 | 1.08170747  |
| C | -6.90222920 | -0.55145520 | 1.06704438  |
| C | -7.60301784 | 0.01138395  | -0.01195142 |

|   |             |             |             |
|---|-------------|-------------|-------------|
| C | -6.88914847 | 0.58243122  | -1.07733324 |
| C | -5.49728408 | 0.57122599  | -1.08016004 |
| C | -9.09736697 | 0.05467221  | -0.07171481 |
| O | -9.71891116 | 0.86991711  | -0.72645873 |
| O | -9.78550812 | -0.86777977 | 0.64178458  |
| C | 9.09736697  | 0.05466688  | 0.07171526  |
| O | 9.71891640  | 0.86990958  | 0.72645646  |
| O | 9.78550081  | -0.86779298 | -0.64178081 |
| H | 0.00000460  | -2.52498900 | 0.00000029  |
| H | -0.00000514 | 2.54574880  | -0.00000488 |
| H | 4.96773287  | -0.94911887 | -1.92979396 |
| H | 7.41827873  | -0.96794546 | -1.92865943 |
| H | 7.42868140  | 1.01966280  | 1.91095340  |
| H | 4.94707746  | 0.98727106  | 1.91829157  |
| H | -4.96773497 | -0.94911517 | 1.92980261  |
| H | -7.41827904 | -0.96792907 | 1.92867227  |
| H | -7.42867939 | 1.01964626  | -1.91095774 |
| H | -4.94707349 | 0.98724789  | -1.91829585 |
| H | -9.19129869 | -1.52427322 | 1.05381134  |
| H | 9.19128493  | -1.52428398 | -1.05380258 |

## Atomic Coordinates of Cosensitizer:

Below, we provide the atomic positions (coordinates) for the optimized geometries of the studied dimer obtained by DFT- B3LYP-D3(BJ)/6-31G(d).

### DI-CA1/ BTD-DTP1 (126 atoms)

|   |              |             |             |   |              |             |             |   |            |             |            |
|---|--------------|-------------|-------------|---|--------------|-------------|-------------|---|------------|-------------|------------|
| C | -1.06192300  | 3.99619600  | -1.92699000 | H | -9.42257200  | 0.04891000  | -0.42643400 | C | 5.09339200 | 0.31470900  | 1.68836500 |
| C | 0.29478900   | 3.68405200  | -1.87869200 | C | -3.10777800  | -0.05281700 | 1.17127600  | C | 3.69168100 | 0.34746400  | 1.59238700 |
| C | 0.76023400   | 2.35320300  | -1.81938400 | C | -2.61059700  | 1.28938200  | 1.29756400  | C | 3.29094800 | 1.68415400  | 1.80099500 |
| C | -0.17878100  | 1.30016300  | -1.86729100 | C | -2.13289000  | -1.03457700 | 1.13009700  | C | 1.89610800 | 1.89614900  | 1.73525900 |
| C | -1.52371800  | 1.61875500  | -1.94348300 | C | -1.17945500  | 1.56831300  | 1.39815300  | C | 1.21521700 | 0.72056500  | 1.47091700 |
| C | -1.96013300  | 2.94277200  | -1.94686700 | C | -0.75046900  | -0.77099200 | 1.21646700  | H | 1.38229600 | 2.83696400  | 1.87125500 |
| C | 2.21357700   | 2.08026000  | -1.71187200 | H | -2.44057300  | -2.07128200 | 1.05556200  | C | 6.90489300 | 1.78758500  | 2.03909800 |
| C | 3.09409800   | 3.07180000  | -1.22518700 | C | -0.21333200  | 0.49973000  | 1.36302700  | H | 7.44144800 | 2.71640700  | 2.18970600 |
| C | 4.46845500   | 2.86554500  | -1.11567300 | H | -0.08375900  | -1.62748000 | 1.19338600  | C | 7.56747600 | 0.57264400  | 1.87143000 |
| C | 4.95809400   | 1.61983300  | -1.47250000 | N | -3.36197800  | 2.39751900  | 1.30312400  | S | 6.43759700 | -0.77953100 | 1.60737200 |
| C | 4.10579600   | 0.62713000  | -1.94258000 | N | -0.90553600  | 2.87397400  | 1.48786100  | S | 2.32146600 | -0.66851200 | 1.28037300 |
| C | 2.74549000   | 0.82959200  | -2.08385000 | S | -2.34086600  | 3.67708500  | 1.43743000  | N | 4.40684300 | 2.47448600  | 2.00264100 |
| C | -2.72337000  | 0.72994800  | -2.03730500 | C | 8.98358200   | 0.46625700  | 1.81433200  | C | 4.40710400 | 3.88807900  | 2.31486400 |
| N | -3.83638500  | 1.60194200  | -2.03596600 | C | 9.80209600   | -0.61892500 | 1.67601700  | H | 3.57808000 | 4.37255500  | 1.79245000 |
| C | -3.44243600  | 2.96242000  | -1.97173600 | H | 9.51697300   | 1.41340900  | 1.85847200  | H | 5.34251500 | 4.33453800  | 1.96862200 |
| C | 6.33562800   | 1.08150600  | -1.41349500 | C | 9.32454100   | -1.95500800 | 1.70572600  | H | 4.30363600 | 4.06779400  | 3.39129600 |
| N | 6.24722600   | -0.27257800 | -1.85783800 | C | 11.27704100  | -0.34144500 | 1.53130400  |   |            |             |            |
| C | 4.90461900   | -0.59705700 | -2.20386800 | N | 8.95310900   | -3.05925000 | 1.75518600  |   |            |             |            |
| C | -5.19960500  | 1.20640700  | -2.08705500 | O | 12.06585400  | -1.32626500 | 1.09201100  |   |            |             |            |
| C | 7.31050900   | -1.20922500 | -1.76911900 | H | 11.61071200  | -2.12663800 | 0.73714200  |   |            |             |            |
| C | -6.08352900  | 1.73898300  | -1.14881900 | O | 11.73358900  | 0.75235300  | 1.79343100  |   |            |             |            |
| C | -7.43000900  | 1.40545200  | -1.21510300 | C | -4.53316900  | -0.39520900 | 1.08099400  |   |            |             |            |
| C | -7.90187000  | 0.55791200  | -2.22335800 | C | -4.93312700  | -1.52069100 | 0.34080500  |   |            |             |            |
| C | -7.00522500  | 0.03614000  | -3.16460100 | C | -5.53770500  | 0.31750800  | 1.75923800  |   |            |             |            |
| C | -5.65170700  | 0.34406800  | -3.09054200 | C | -6.25052000  | -1.95082000 | 0.31498200  |   |            |             |            |
| C | 7.03053000   | -2.56872400 | -1.56628100 | H | -4.20005700  | -2.05794900 | -0.25055000 |   |            |             |            |
| C | 8.07274000   | -3.46567800 | -1.38193800 | C | -6.86408000  | -0.08632500 | 1.71214500  |   |            |             |            |
| C | 9.40076500   | -3.02469800 | -1.36758300 | H | -5.27656600  | 1.20250200  | 2.32676300  |   |            |             |            |
| C | 9.67372900   | -1.67185200 | -1.58899400 | C | -7.24831300  | -1.24349900 | 1.00575500  |   |            |             |            |
| C | 8.64216600   | -0.76954600 | -1.81537200 | H | -6.50264800  | -2.83796900 | -0.24961900 |   |            |             |            |
| O | -2.76817100  | -0.47909800 | -2.11357500 | H | -7.61224900  | 0.49026800  | 2.24342400  |   |            |             |            |
| O | -4.18558500  | 3.91815500  | -1.94004000 | N | -8.60663200  | -1.64093100 | 0.97600000  |   |            |             |            |
| O | 4.50691800   | -1.66412300 | -2.61971200 | C | -9.03443200  | -2.75461100 | 0.17593200  |   |            |             |            |
| O | 7.34182000   | 1.65843300  | -1.05996300 | C | -9.75014900  | -3.80628700 | 0.76045800  |   |            |             |            |
| C | 10.51291400  | -3.93374900 | -0.98616500 | C | -8.77394800  | -2.78765500 | -1.19972500 |   |            |             |            |
| O | 11.48006000  | -3.58012600 | -0.33878100 | C | -10.20948200 | -4.86271200 | -0.02459000 |   |            |             |            |
| O | 10.41697700  | -5.22123700 | -1.37941400 | H | -9.95478800  | -3.79000700 | 1.82486000  |   |            |             |            |
| C | -9.35486200  | 0.22532300  | -2.34189900 | C | -9.22614300  | -3.85103100 | -1.97538800 |   |            |             |            |
| O | -9.91261500  | 0.01717800  | -3.39264100 | H | -8.20662200  | -1.98938800 | -1.65953200 |   |            |             |            |
| O | -10.04305400 | 0.18171000  | -1.16766200 | C | -9.95203000  | -4.89212700 | -1.39482200 |   |            |             |            |
| H | -1.40855400  | 5.02388500  | -1.95344200 | H | -10.76781100 | -5.66833100 | 0.44358100  |   |            |             |            |
| H | 1.01092200   | 4.49684300  | -1.90298200 | H | -9.02287100  | -3.85211800 | -3.04207800 |   |            |             |            |
| H | 0.12695000   | 0.26240100  | -1.81011300 | H | -10.31451400 | -5.71431600 | -2.00420100 |   |            |             |            |
| H | 2.68850800   | 4.02000300  | -0.89250200 | C | -9.45124500  | -1.32008900 | 2.09467500  |   |            |             |            |
| H | 5.13072600   | 3.63838000  | -0.74172600 | C | -9.00778800  | -1.49231800 | 3.41071900  |   |            |             |            |
| H | 2.12168100   | 0.03598200  | -2.47728300 | C | -10.75571600 | -0.87555500 | 1.85263700  |   |            |             |            |
| H | -5.70913300  | 2.39433100  | -0.37376700 | C | -9.85617600  | -1.19311700 | 4.47542400  |   |            |             |            |
| H | -8.11745600  | 1.82813900  | -0.48948800 | H | -8.00074600  | -1.85274000 | 3.59228900  |   |            |             |            |
| H | -7.38665700  | -0.60384300 | -3.95327200 | C | -11.60216100 | -0.59108500 | 2.92275000  |   |            |             |            |
| H | -4.94887800  | -0.06426300 | -3.80732800 | H | -11.10497100 | -0.76875500 | 0.83080600  |   |            |             |            |
| H | 6.00811800   | -2.91260000 | -1.52599000 | C | -11.15546300 | -0.74176100 | 4.23659100  |   |            |             |            |
| H | 7.83406600   | -4.50030900 | -1.15242400 | H | -9.50304900  | -1.32616800 | 5.49401000  |   |            |             |            |
| H | 10.70162300  | -1.32529000 | -1.56448000 | H | -12.61236900 | -0.24468700 | 2.72553600  |   |            |             |            |
| H | 8.86315400   | 0.27516300  | -1.97329500 | H | -11.81540200 | -0.51308300 | 5.06803300  |   |            |             |            |
| H | 9.65968000   | -5.32155900 | -1.98004100 | C | 5.51465400   | 1.64313000  | 1.94412200  |   |            |             |            |

## References

1. A. D. Becke, *The Journal of chemical physics*, 1993, **98**, 1372-1377.
2. C. Lee, W. Yang and R. G. Parr, *Phys Rev B Condens Matter*, 1988, **37**, 785-789.
3. C. Adamo and V. Barone, *The Journal of chemical physics*, 1999, **110**, 6158-6170.
4. A. Austin, G. A. Petersson, M. J. Frisch, F. J. Dobek, G. Scalmani and K. Throssell, *Journal of chemical theory and computation*, 2012, **8**, 4989-5007.
5. Y. Zhao and D. G. Truhlar, *Theoretical Chemistry Accounts*, 2008, **120**, 215-241.
6. A. D. Boese and N. C. Handy, *The Journal of chemical physics*, 2002, **116**, 9559-9569.
7. V. N. Staroverov, G. E. Scuseria, J. Tao and J. P. Perdew, *The Journal of chemical physics*, 2003, **119**, 12129-12137.
8. T. Yanai, D. P. Tew and N. C. Handy, *Chemical physics letters*, 2004, **393**, 51-57.
9. O. A. Vydrov and G. E. Scuseria, *The Journal of chemical physics*, 2006, **125**, 234109.
10. J.-D. Chai and M. Head-Gordon, *Physical Chemistry Chemical Physics*, 2008, **10**, 6615-6620.
11. R. Peverati and D. G. Truhlar, *The Journal of Physical Chemistry Letters*, 2011, **2**, 2810-2817.
12. T. M. Henderson, A. F. Izmaylov, G. E. Scuseria and A. Savin, *The Journal of chemical physics*, 2007, **127**, 221103.
13. T. M. Henderson, A. F. Izmaylov, G. E. Scuseria and A. Savin, *Journal of chemical theory and computation*, 2008, **4**, 1254-1262.
14. R. Peverati and D. G. Truhlar, *Physical Chemistry Chemical Physics*, 2012, **14**, 16187-16191.
15. C. Suellen, R. G. Freitas, P.-F. o. Loos and D. Jacquemin, *Journal of chemical theory and computation*, 2019, **15**, 4581-4590.
